# Supplementary material for: Pentagonal two-dimensional noble-metal dichalcogenide PdSSe for photocatalytic water splitting with pronounced optical absorption and ultrahigh anisotropic carrier mobility
Source: Royal Society of Chemistry journal article supplement (doi:10.1039/d1tc01245b), 2021-01-01
Supplement: d1tc01245b1.pdf [file d1tc01245b1.pdf]

## Electronic Supplementary Information (ESI)

### **Pentagonal two-dimensional noble-metal dichalcogenides PdSSe for photocatalytic water splitting with pronounced optical absorption and ultrahigh anisotropic carrier mobility**

Feng Xiao,<sup>1</sup> Wen Lei,<sup>1,2</sup> Wei Wang,<sup>1</sup> Lili Xu,<sup>3</sup> Shengli Zhang,<sup>3\*</sup> and Xing Ming<sup>1,4\*</sup>

*1. College of Science, Guilin University of Technology, Guilin 541004, PR China*

*2. Key Laboratory of Artificial Micro- and Nano-Structures of Ministry of Education and School of Physics and Technology, Wuhan University, Wuhan 430072, PR China*

*3. MIIT Key Laboratory of Advanced Display Materials and Devices, School of Materials Science and Engineering, Nanjing University of Science and Technology, Nanjing 210094, PR China.*

*4. MOE Key Laboratory of New Processing Technology for Nonferrous Metal & Materials, Guilin University of Technology, Guilin 541004, China*

Email: [mingxing@glut.edu.cn](mailto:mingxing@glut.edu.cn) (Xing Ming) [zhangslvip@njut.edu.cn](mailto:zhangslvip@njut.edu.cn) (Shengli Zhang)

|                                                                                                   |    |
|---------------------------------------------------------------------------------------------------|----|
| 1. The choice of the semiempirical correction methods.....                                        | 2  |
| 2. The phonon spectrum and electronic structure of bulk PdSSe .....                               | 5  |
| 3. Exfoliation of 2D monolayer PdSSe from bulk .....                                              | 7  |
| 4. Comparisons of band gaps and optical properties with other candidate photocatalyst materials   | 11 |
| 5. Fitting of in-plane elastic modulus $C_{2d}$ and deformation potential constant $E_{1i}$ ..... | 13 |
| 6. Water molecule adsorbed on the monolayer surface .....                                         | 15 |
| Reference .....                                                                                   | 16 |

## 1. The choice of the semiempirical correction methods

Considering that PdSSe, as isomorphous intermediate of PdSe<sub>2</sub> and PdS<sub>2</sub>, adopts layered five-membered ring structure and van der Waals interaction exists along the *c* axis layer-stacking direction. In order to apply appropriate correction methods to PdSSe crystals, we employ the correction method, Tkatchenko-Scheffler method (PBE-TS), which is applicable to both the PdS<sub>2</sub> and PdSe<sub>2</sub>. In [Table S1](#) and [Table S2](#), our theoretical calculated lattice parameters with different methods of correction are compared with previous experimental data and calculation results. As for the optimized PdSe<sub>2</sub> lattices, the error of IHP-PBE-TS, PBE-MBD and PBE-TS methods is very small, but the first two methods slightly overestimate the lattice constant *c* of PdS<sub>2</sub>. Compared with the other correction methods, PBE-TS method performs well in optimizing PdS<sub>2</sub> and PdSe<sub>2</sub> with small errors. Used to optimize PdSSe, the theoretical results are consistent with the experimental results, shown in [Table 1](#) in the main text, implying the validity of our choice with the PBE-TS method.

**Table S1** Calculated lattice constants and cell volume for the PdS<sub>2</sub> compared with experimental data.

| PdS <sub>2</sub>   | Lattice constant |       |       | Volume             | Relative error (%) |              |              |              |
|--------------------|------------------|-------|-------|--------------------|--------------------|--------------|--------------|--------------|
|                    | a(Å)             | b(Å)  | c(Å)  | V(Å <sup>3</sup> ) | $\Delta a/a$       | $\Delta b/b$ | $\Delta c/c$ | $\Delta V/V$ |
| Expt. <sup>1</sup> | 5.460            | 5.541 | 7.531 | 227.842            | -                  | -            | -            | -            |
| PBE                | 5.487            | 5.579 | 8.718 | 266.880            | 0.5                | 0.7          | 15.8         | 17.1         |
| PBE-sol            | 5.442            | 5.524 | 7.546 | 226.859            | 0.3                | 0.3          | 0.2          | 0.4          |
| LDA                | 5.454            | 5.515 | 7.016 | 211.045            | 0.1                | 0.5          | 6.8          | 7.4          |
| DFT-D3(Grimme)     | 5.513            | 5.577 | 7.100 | 218.328            | 1.0                | 0.7          | 5.7          | 4.2          |
| PBE-dDsC           | 5.478            | 5.562 | 7.592 | 231.304            | 0.3                | 0.4          | 0.8          | 1.5          |
| PBE-D2             | 5.481            | 5.558 | 7.616 | 232.047            | 0.4                | 0.3          | 1.1          | 1.8          |
| PBE-D3(BJ)         | 5.508            | 5.576 | 7.474 | 229.497            | 0.9                | 0.6          | 0.8          | 0.7          |
| IHP_PBE-TS         | 5.499            | 5.578 | 8.035 | 246.455            | 0.7                | 0.7          | 6.7          | 8.2          |
| PBE-MBD            | 5.484            | 5.574 | 7.771 | 237.551            | 0.4                | 0.6          | 3.2          | 4.3          |
| PBE-TS             | 5.515            | 5.588 | 7.691 | 237.038            | 1.0                | 0.8          | 2.1          | 4.0          |
| optB86b            | 5.672            | 5.757 | 8.121 | 265.198            | 3.9                | 3.9          | 7.8          | 16.4         |
| optP88             | 5.496            | 5.580 | 7.458 | 228.715            | 0.7                | 0.7          | 1.0          | 0.4          |
| optPBE             | 5.523            | 5.608 | 7.619 | 236.012            | 1.2                | 1.2          | 1.2          | 3.6          |

**Table S2** Calculated lattice constants and cell volume for the PdSe<sub>2</sub> compared with experimental data.

| PdSe <sub>2</sub>  | Lattice constant |       |       | Volume             | Relative error (%) |       |      |      |
|--------------------|------------------|-------|-------|--------------------|--------------------|-------|------|------|
|                    | a(Å)             | b(Å)  | c(Å)  | V(Å <sup>3</sup> ) | Δa/a               | Δb/b  | Δc/c | ΔV/V |
| Expt. <sup>1</sup> | 5.741            | 5.866 | 7.691 | 259.01             | -                  | -     | -    | -    |
| PBE                | 5.782            | 5.933 | 8.588 | 294.658            | 0.7                | 1.2   | 11.7 | 13.8 |
| PBE-sol            | 6.178            | 6.135 | 6.148 | 233.044            | 7.6                | 4.6   | 20.1 | 10   |
| LDA                | 6.094            | 6.099 | 6.099 | 226.669            | 6.1                | 4     | 20.7 | 12.5 |
| DFT-D3(Grimme)     | 6.218            | 6.166 | 6.167 | 236.452            | 8.3                | 0.051 | 19.8 | 8.7  |
| PBE-dDsC           | 5.851            | 5.949 | 7.337 | 255.403            | 1.9                | 1.4   | 4.6  | 1.4  |
| PBE-D2             | 6.194            | 6.204 | 6.191 | 237.897            | 7.9                | 5.8   | 19.5 | 8.2  |
| PBE-D3(BJ)         | 5.897            | 5.956 | 7.16  | 251.517            | 2.7                | 1.5   | 6.9  | 2.9  |
| IHP_PBE-TS         | 5.853            | 5.95  | 7.728 | 269.139            | 2                  | 1.4   | 0.5  | 3.9  |
| PBE-MBD            | 5.821            | 5.939 | 7.644 | 264.28             | 1.4                | 1.2   | 0.6  | 2    |
| PBE-TS             | 5.857            | 5.95  | 7.713 | 268.78             | 2                  | 1.4   | 0.3  | 3.8  |
| optB86b            | 6.006            | 6.144 | 8.389 | 309.516            | 4.6                | 4.7   | 9.1  | 19.5 |
| optP88             | 6.323            | 6.197 | 6.157 | 241.259            | 10.1               | 5.6   | 19.9 | 6.9  |
| optPBE             | 5.891            | 5.999 | 7.486 | 264.518            | 2.6                | 2.3   | 2.7  | 2.1  |

## 2. The phonon spectrum and electronic structure of bulk PdSSe

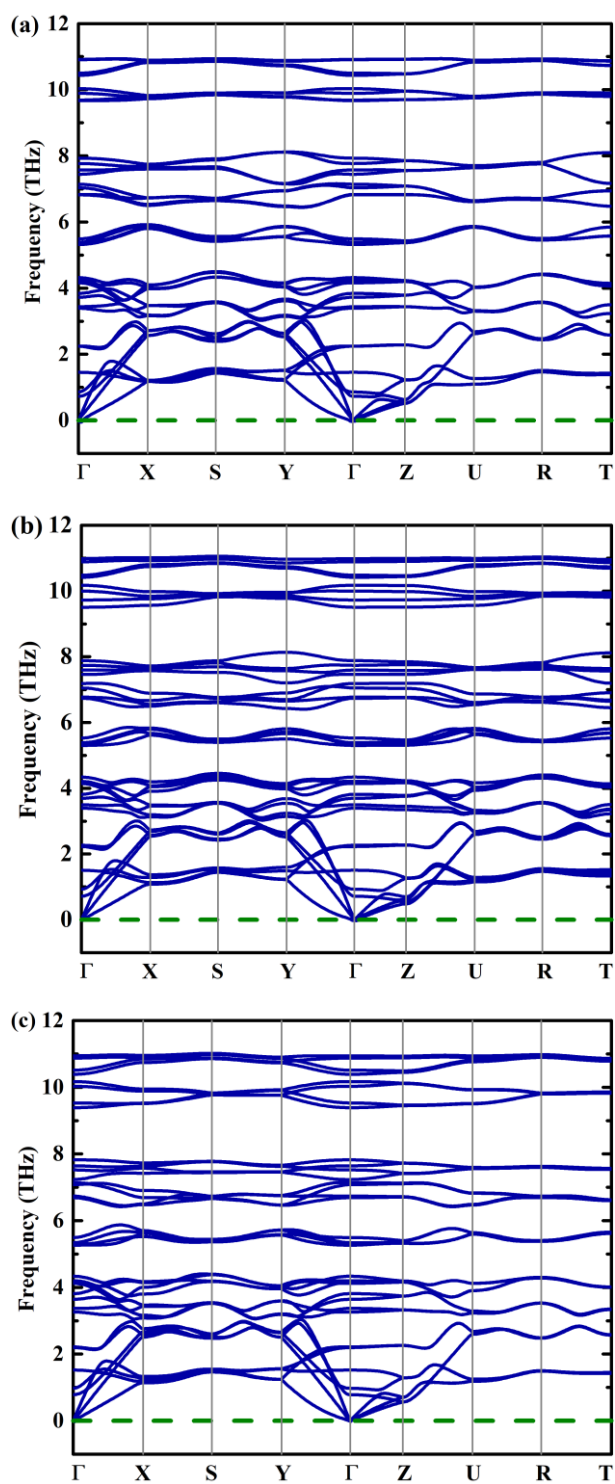

**Figure S1** The phonon spectra along the high-symmetry lines for bulk phases of (a) *AA*, (b) *AB* and (c) *BB* polymorphs.

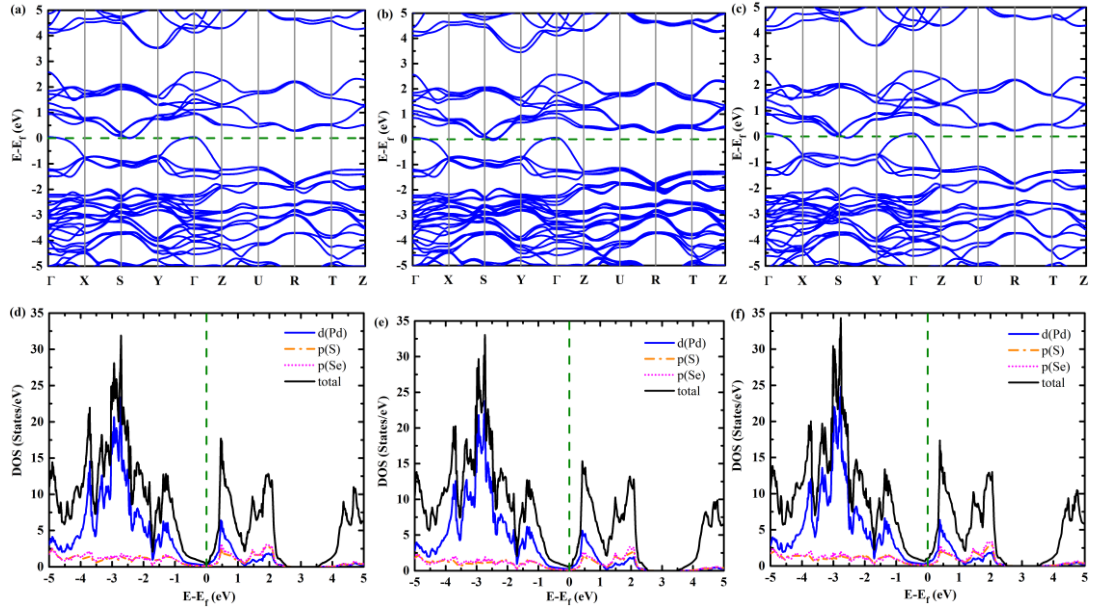

**Figure S2** Band structure of the bulk phases PdSSe of (a) *AA*, (b) *AB*, (d) *BB* polymorphs, and the corresponding density of states for (d) *AA*, (e) *AB*, (f) *BB* polymorphs calculated with PBE.

### 3. Exfoliation of 2D monolayer PdSSe from bulk

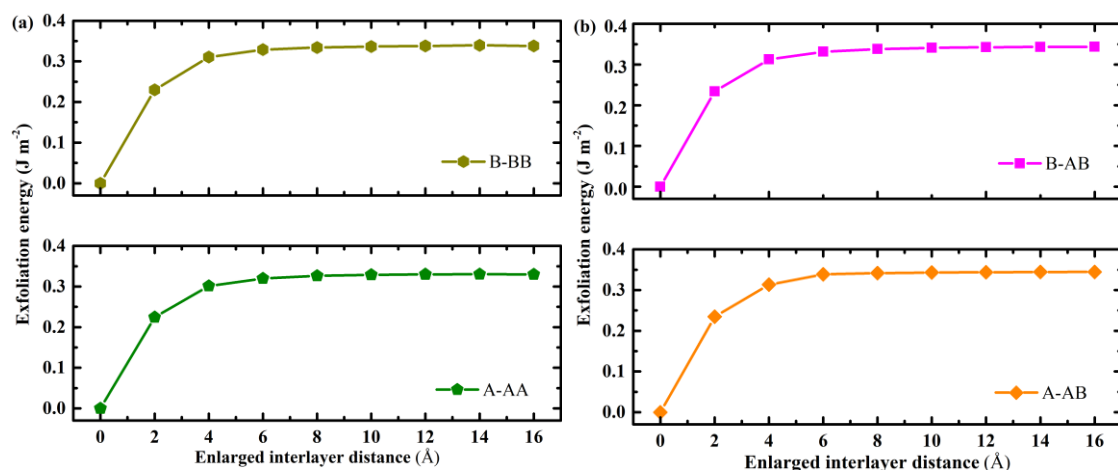

**Figure S3** The exfoliation energy estimation for monolayer PdSSe from (a) *AA* or *BB* bulk and (b) *AB* bulk.

**Table S3** The energy required to exfoliate PdSSe monolayer from their corresponding bulk phases, which are compared with the exfoliation energy of isostructural monolayer PdS<sub>2</sub> and PdSe<sub>2</sub>.

| Type of monolayer              | provenance | $E_{exfl.}$ (J m <sup>-2</sup> ) |
|--------------------------------|------------|----------------------------------|
| <i>A</i>                       | <i>AA</i>  | 0.330                            |
|                                | <i>AB</i>  | 0.345                            |
| <i>B</i>                       | <i>AB</i>  | 0.343                            |
|                                | <i>BB</i>  | 0.338                            |
| PdS <sub>2</sub> <sup>2</sup>  |            | 0.31                             |
| PdSe <sub>2</sub> <sup>2</sup> |            | 0.33                             |

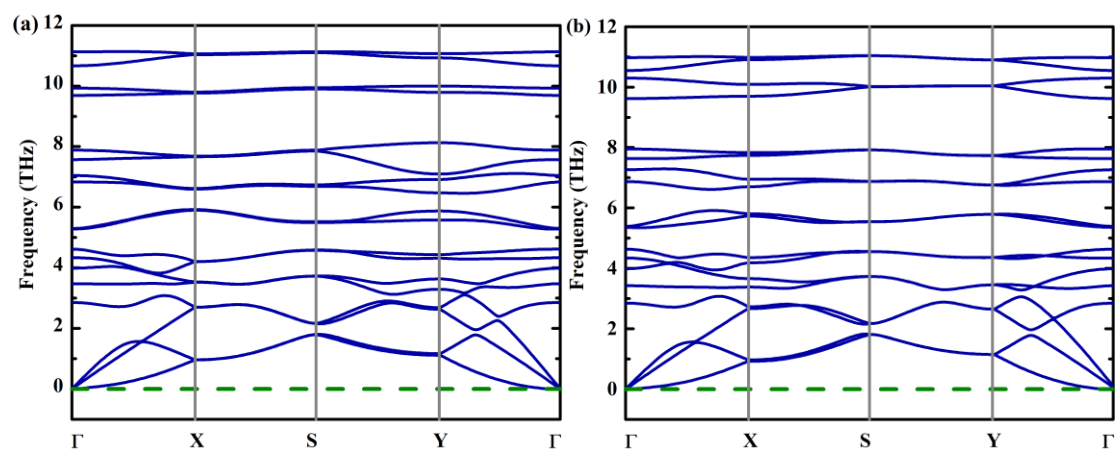

**Figure S4** Calculated phonon dispersion curves of (a) *A* and (b) *B* monolayers.

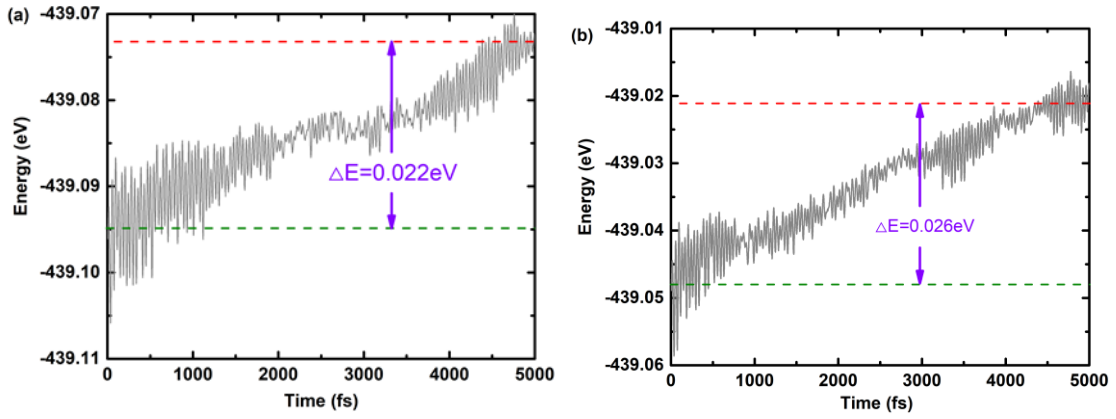

**Figure S5** Total potential energy of monolayer (a) *A* and (b) *B* in AIMD.

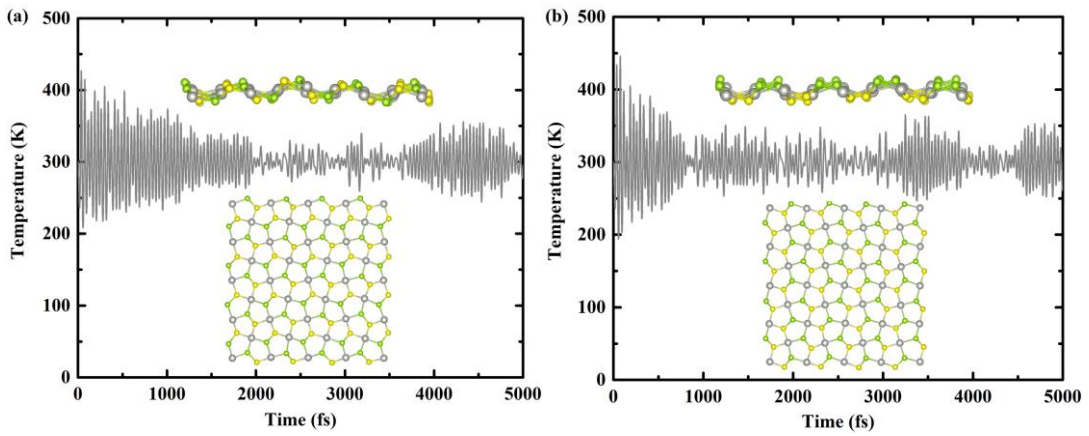

**Figure S6** The temperature fluctuations with respect to AIMD steps at 300 K (using  $4 \times 4 \times 1$  supercell) and the snapshot of the PdSSe monolayer (a) *A* and (b) *B* at the end of 5 ps.

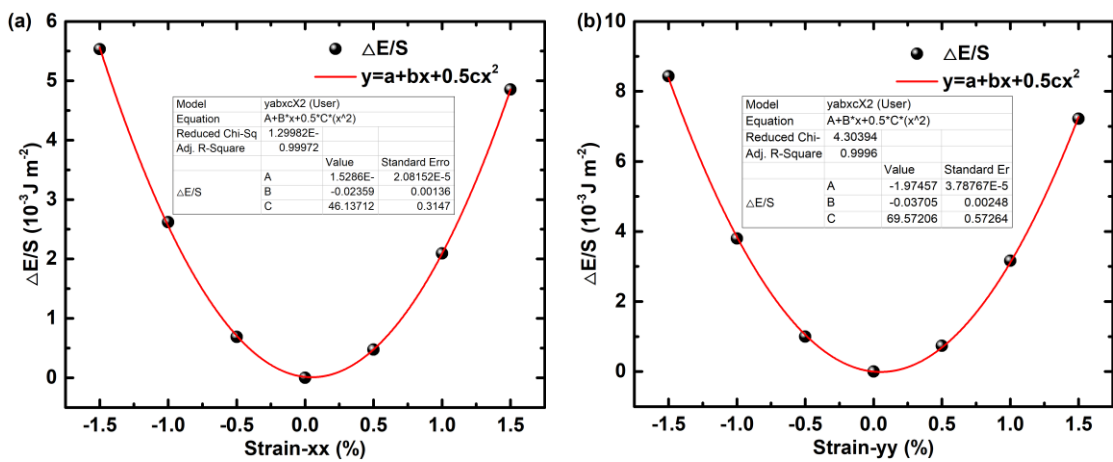



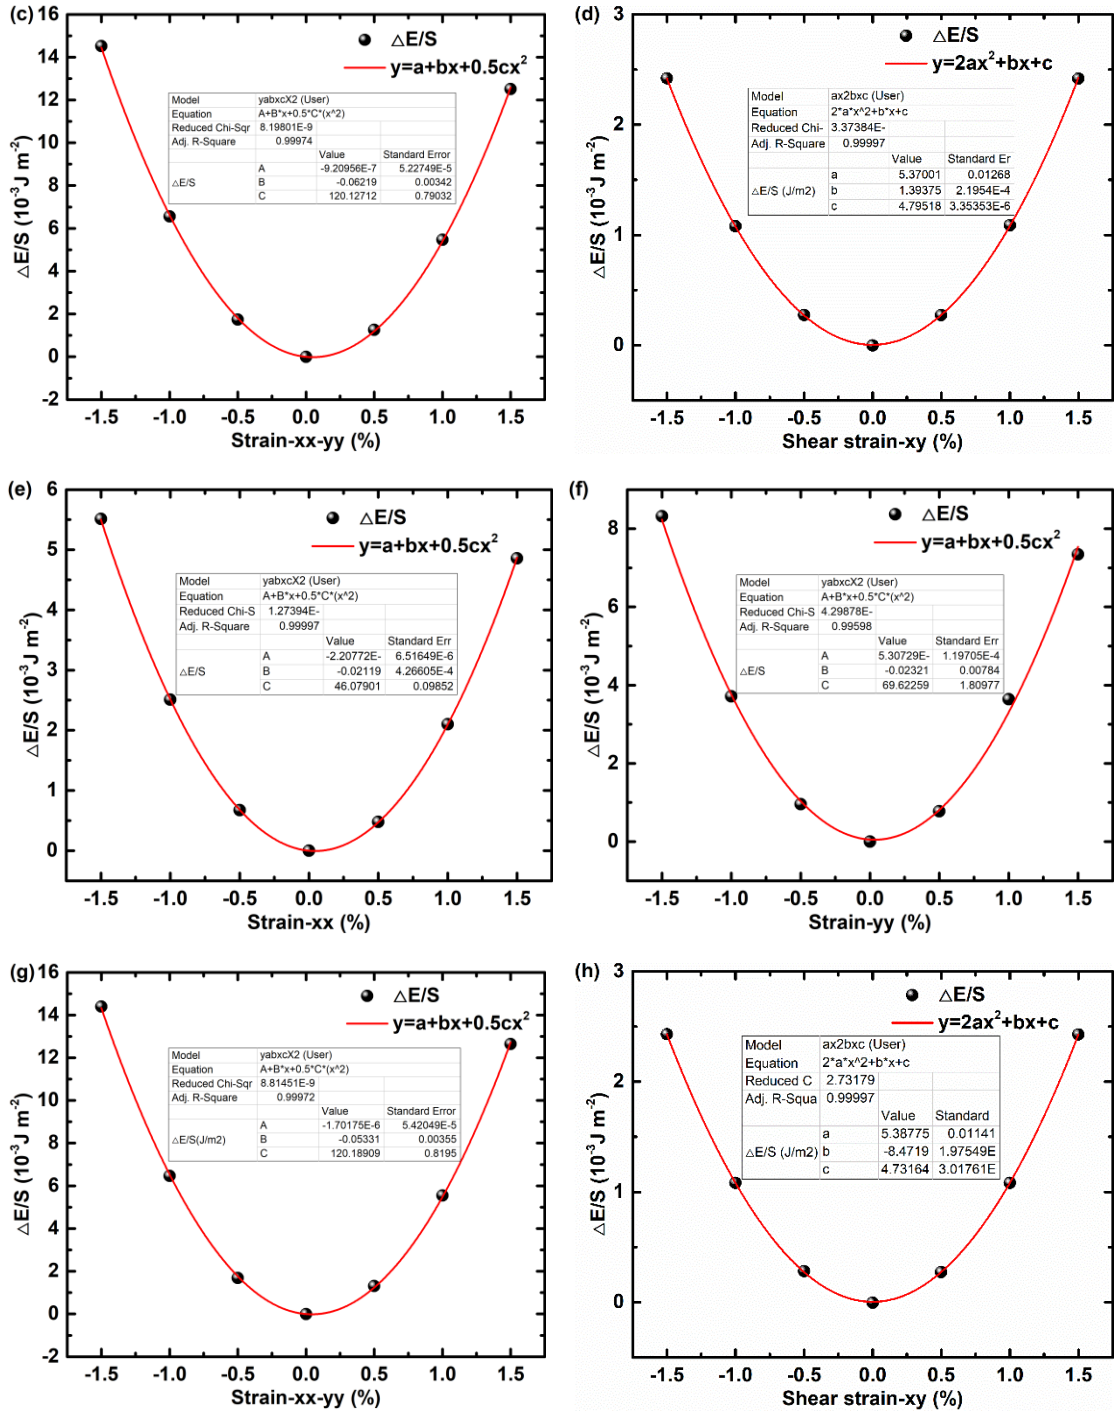

**Figure S7** Introducing tiny deformation, the elastic constants are obtained by fitting the elastic energy per unit area and strain: in monolayer *A*, (a) *x* axial deformation for fitting  $C_{11}$ , (b) *y* axial deformation for fitting  $C_{22}$ , (c) hydrostatic planar deformation for fitting  $C_{11} + C_{22} + 2C_{12}$  and (d) shear deformation for fitting  $C_{44}$ ; the same manners of deformation in monolayer *B* to fit (e)  $C_{11}$ , (f)  $C_{22}$ , (g)  $C_{11} + C_{22} + 2C_{12}$ , and (h)  $C_{44}$ .

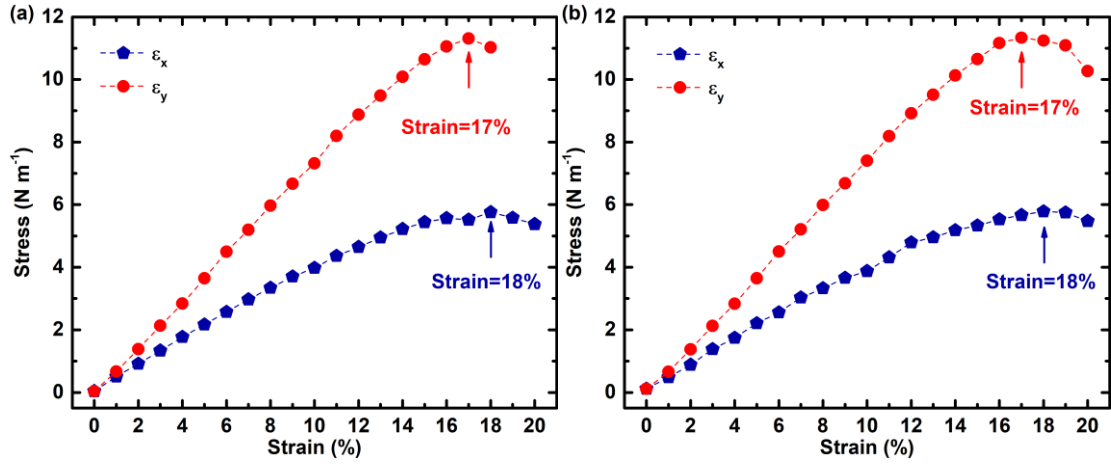

**Figure S8** Calculated stress-strain relationship of monolayer A (a) and B (b) PdSSe. The arrows indicate the critical tensile strains (up to 18% and 17% for uniaxial strain in the  $x$  and  $y$  directions).

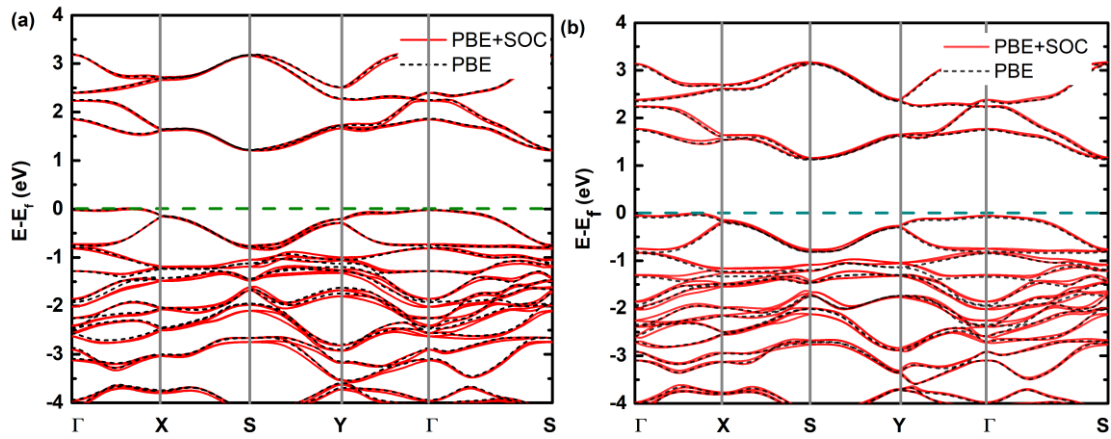

**Figure S9** The band structures of monolayer (a) A and (b) B PdSSe calculated with PBE and PBE+SOC.

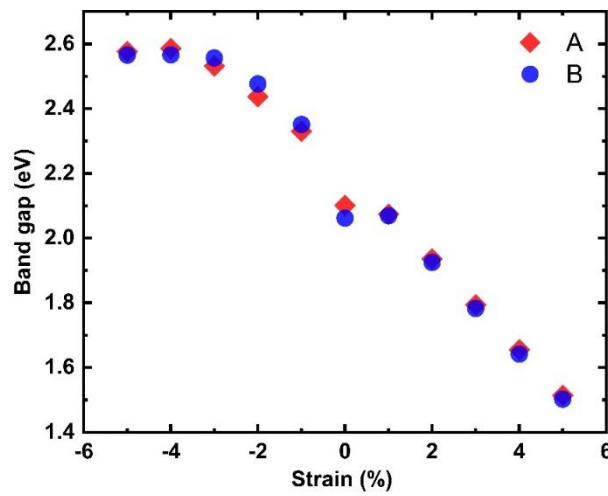

**Figure S10** Band gap (calculated with HSE06) variations of the A and B monolayer PdSSe as a function of biaxial strain.

#### 4. Comparisons of band gaps and optical properties with other candidate photocatalyst materials

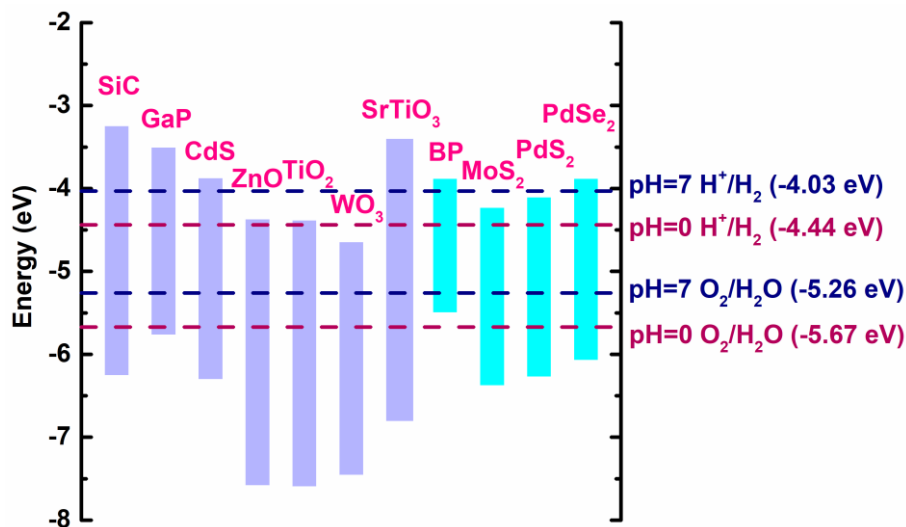

**Figure S11** A comparison of band edge positions of common photocatalyst candidate semiconductors.<sup>3</sup> As a supplement, the band edge positions of the typical 2D materials BP and MoS<sub>2</sub>, as well as the isostructural NMDCs materials PdX<sub>2</sub> are calculated and marked in blue (BP is short for black phosphorus).

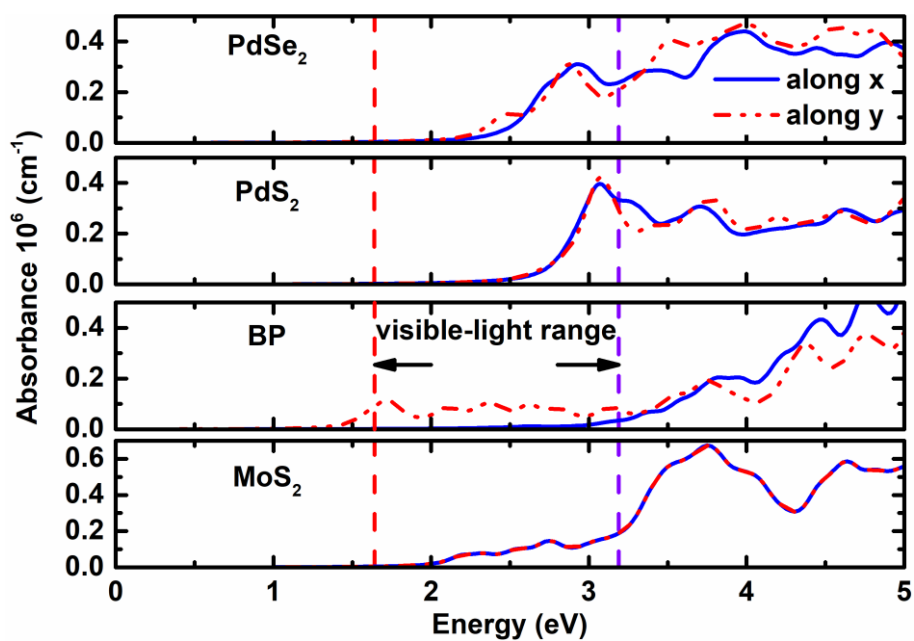

**Figure S12** The light absorption coefficient of PdSe<sub>2</sub>, PdS<sub>2</sub>, BP (black phosphorus) and MoS<sub>2</sub>.

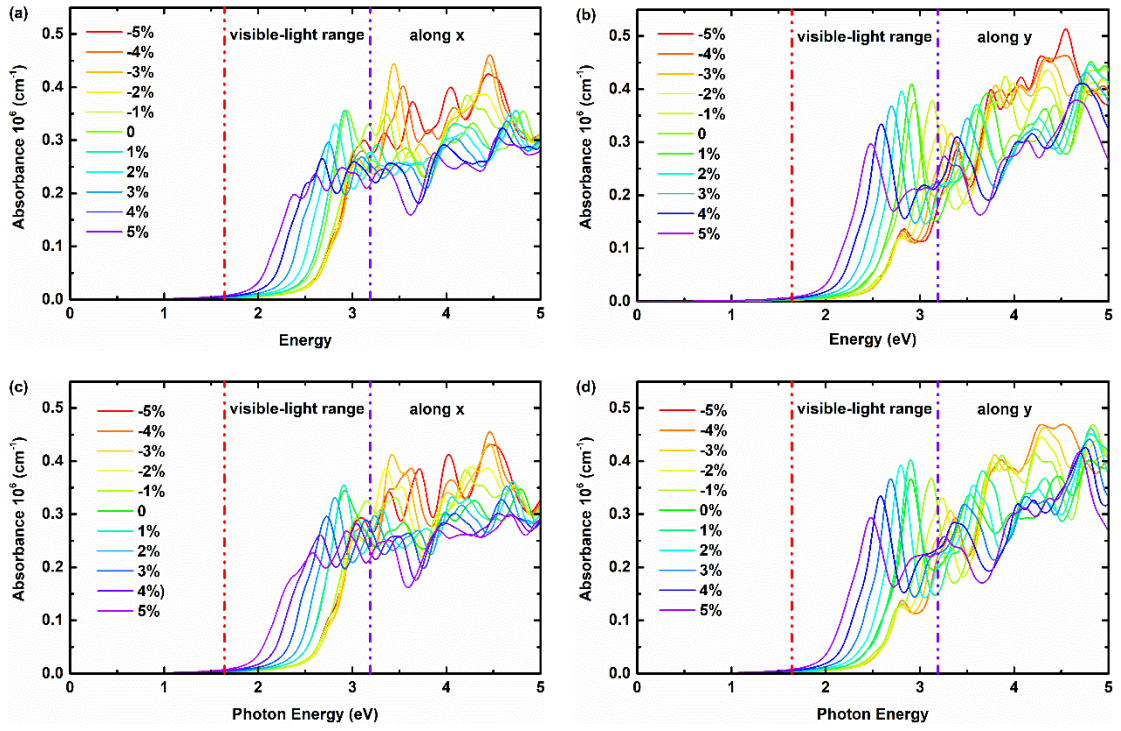

**Figure S13** The light absorption coefficient of monolayer PdSSe under strains: *A* monolayer PdSSe along x (a) and y (b) directions; *B* monolayer PdSSe along x (c) and y (d) directions.

## 5. Fitting of in-plane elastic modulus $C_{2d}$ and deformation potential constant $E_1^i$

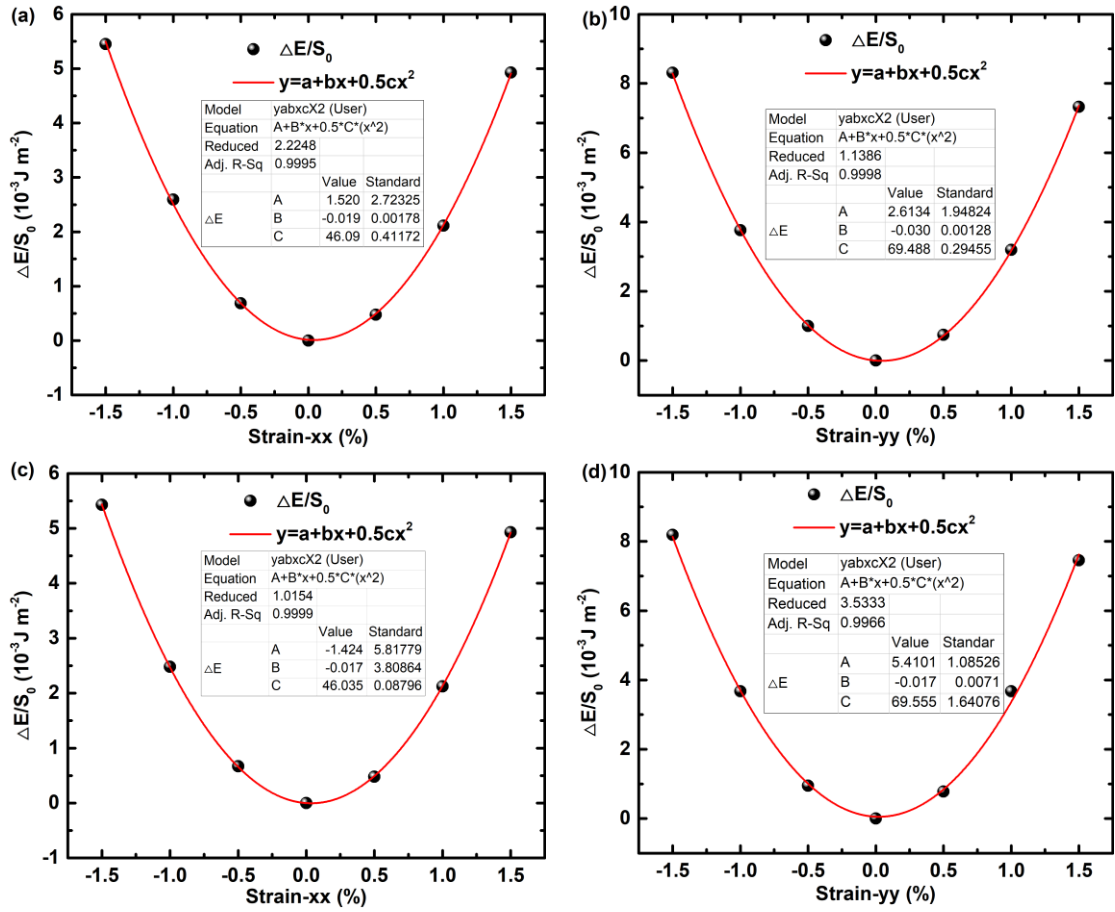

**Figure S14** The in-plane elastic modulus  $C_{2d}$  is calculated by quadratic function fitting for monolayer *A* in the (a) *x* and (b) *y* directions; for monolayer *B* in the (c) *x* and (d) *y* directions.

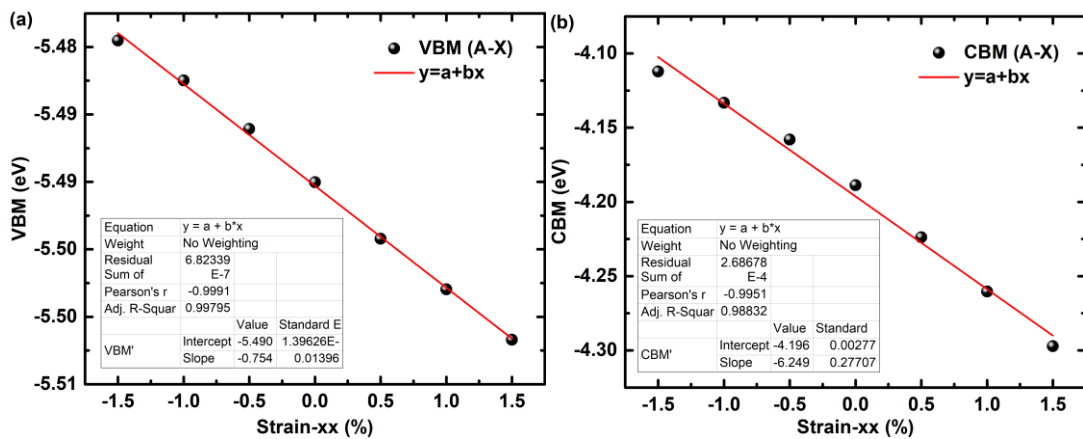

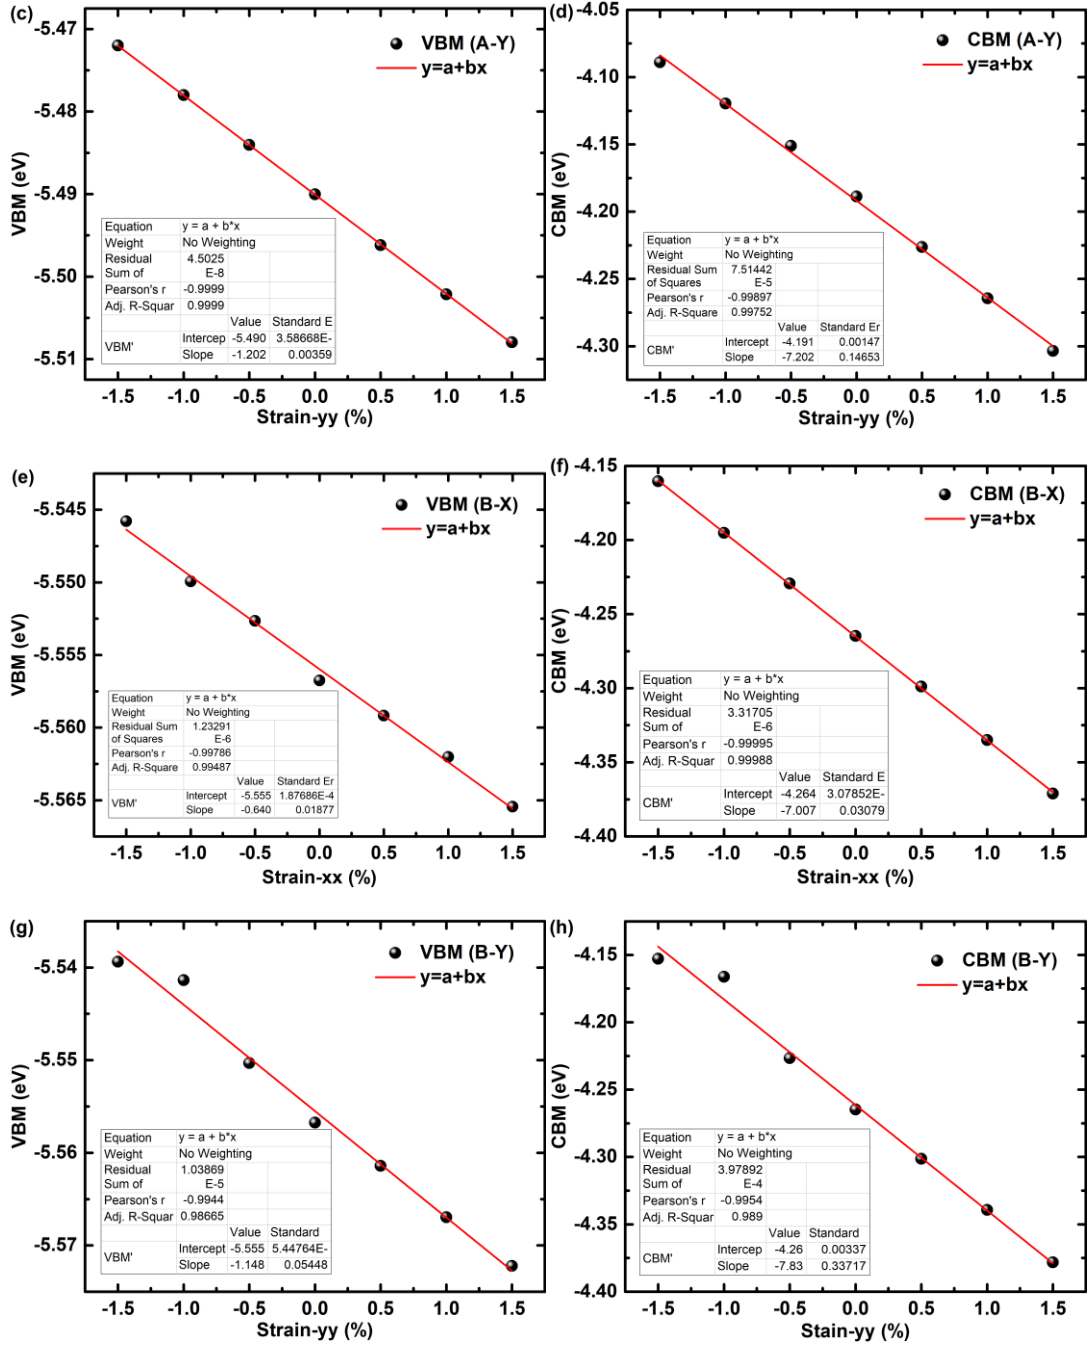

**Figure S15** Fitting the deformation potential constant  $E_1^i$  for monolayer A: (a) x axis uniaxial strained VBM, (b) x axis uniaxial strained CBM, (c) y axis uniaxial strained VBM and (d) y axis uniaxial strained CBM; for monolayer B: (e) x axis uniaxial strained VBM, (f) x axis uniaxial strained CBM, (g) y axis uniaxial strained VBM and (h) y axis uniaxial strained CBM.

## 6. Water molecule adsorbed on the monolayer surface

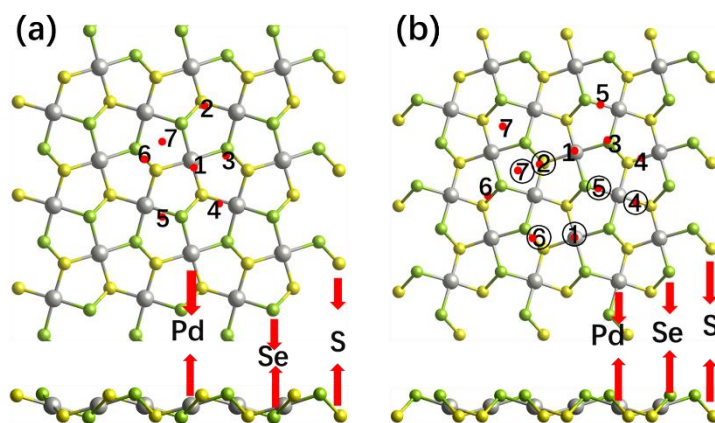

**Figure S16** The initial adsorption positions of the  $\text{H}_2\text{O}$  molecules marked by the small red dot on the surface of monolayer *A* (a) and *B* (b). On the surface of Janus *B* monolayer, the adsorptions on the Se side are marked by a number with a small circle.

**Table S4** Adsorption energy (eV) of water molecules on the surface of the PdSSe monolayers. B(S) and B(Se) represent the S and Se atomic side of the *B* monolayer, respectively. The most stable sites for two monolayers are highlight in red.

| Surface/initial site | 1      | 2      | 3     | 4      | 5             | 6      | 7             |
|----------------------|--------|--------|-------|--------|---------------|--------|---------------|
| A                    | -0.053 | -0.086 | 0.023 | -0.076 | 0.041         | 0.052  | <b>-0.133</b> |
| B(S)                 | 0.143  | 0.035  | -     | -0.038 | -0.102        | -0.063 | -0.151        |
| B(Se)                | -0.145 | -      | 0.003 | 0.039  | <b>-0.162</b> | 0.010  | -0.008        |



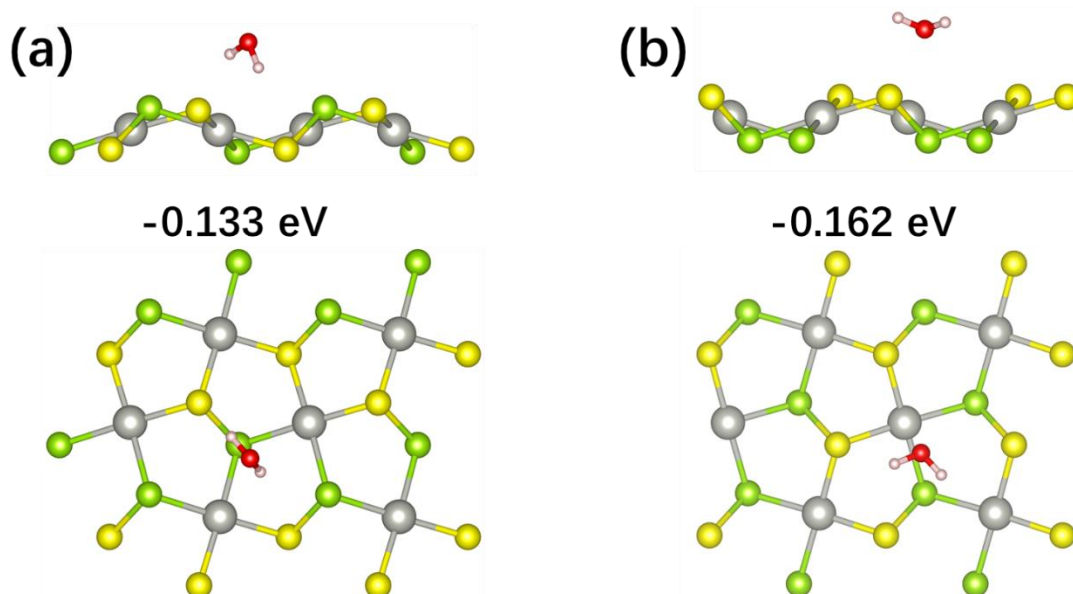

**Figure S17** The most favorable adsorption configurations of the water molecules on the surface of monolayer *A* (a) and *B* (b). The energies in the figures are adsorption energies.

### Reference

- 1 Grønvold, F., and E. Røst. The crystal structure of PdSe<sub>2</sub> and PdS<sub>2</sub>. *Acta Crystallographica*, 1957, 10: 329-331
- 2 Hulliger, F. Electrical properties of some nickel-group chalcogenides. *Journal of Physics and Chemistry of Solids*, 1965, 26: 639-645
- 3 Tong, H., Ouyang, S., Bi, Y., Umezawa, N., Oshikiri, M., & Ye, J.. Nano-photocatalytic materials: possibilities and challenges. *Advanced materials*, 2012, 24: 229-251
